# Supplementary material for: Whole-Exome Sequencing Characterized the Landscape of Somatic Mutations and Pathways in Colorectal Cancer Liver Metastasis
Source: J Oncol. 2019 Nov 11;2019:2684075. doi: 10.1155/2019/2684075 (PMC6877969; doi:10.1155/2019/2684075)
Supplement: Supplementary Materials — Supplemental Table 1: clinical characteristics of the patients. Supplemental Table 2: the number of SNV in the CRLM samples. Supplemental Table 3: list of pathway genes in CRLM. [file 2684075.f1.zip]

Archive with 3 entries (3 files):
- 2684075.f1/Supplemental Table 1.docx
- 2684075.f1/Supplemental Table 2.xlsx
- 2684075.f1/Supplemental Table 3.xlsx
