# Supplementary material for: Whole-Exome Sequencing Characterized the Landscape of Somatic Mutations and Pathways in Colorectal Cancer Liver Metastasis
Source: J Oncol. 2019 Nov 11;2019:2684075. doi: 10.1155/2019/2684075 (PMC6877969; doi:10.1155/2019/2684075)
Supplement: Supplementary Materials — Supplemental Table 1: clinical characteristics of the patients. Supplemental Table 2: the number of SNV in the CRLM samples. Supplemental Table 3: list of pathway genes in CRLM. [file 2684075.f1.zip › 2684075.f1/Supplemental Table 3.xlsx]

## Sheet: Angiogenesis
Gene ID	Mapped IDs	Gene Name	PANTHER Family/Subfamily	PANTHER Protein Class	Species
HUMAN|HGNC=8980|UniProtKB=O00459	PIK3R2	Phosphatidylinositol 3-kinase regulatory subunit beta	PHOSPHATIDYLINOSITOL 3-KINASE REGULATORY SUBUNIT BETA (PTHR10155:SF1)	kinase modulator	Homo sapiens
		PIK3R2
		ortholog
HUMAN|HGNC=5724|UniProtKB=Q06330	RBPJ	Recombining binding protein suppressor of hairless	RECOMBINING BINDING PROTEIN SUPPRESSOR OF HAIRLESS (PTHR10665:SF3)	nucleic acid binding	Homo sapiens
		RBPJ		transcription factor
		ortholog
HUMAN|HGNC=6871|UniProtKB=P28482	MAPK1	Mitogen-activated protein kinase 1	MITOGEN-ACTIVATED PROTEIN KINASE 1 (PTHR24055:SF203)	non-receptor serine/threonine protein kinase	Homo sapiens
		MAPK1
		ortholog
HUMAN|HGNC=7881|UniProtKB=P46531	NOTCH1	Neurogenic locus notch homolog protein 1	NEUROGENIC LOCUS NOTCH HOMOLOG PROTEIN 1 (PTHR45836:SF12)	-	Homo sapiens
		NOTCH1
		ortholog
HUMAN|HGNC=8804|UniProtKB=P09619	PDGFRB	Platelet-derived growth factor receptor beta	PLATELET-DERIVED GROWTH FACTOR RECEPTOR BETA (PTHR24416:SF53)	-	Homo sapiens
		PDGFRB
		ortholog
HUMAN|HGNC=12775|UniProtKB=O00744	WNT10B	Protein Wnt-10b	PROTEIN WNT-10B (PTHR12027:SF76)	signaling molecule	Homo sapiens
		WNT10B
		ortholog
HUMAN|HGNC=3086|UniProtKB=O14641	DVL2	Segment polarity protein dishevelled homolog DVL-2	SEGMENT POLARITY PROTEIN DISHEVELLED HOMOLOG DVL-2 (PTHR10878:SF8)	enzyme modulator	Homo sapiens
		DVL2		signaling molecule
		ortholog
HUMAN|HGNC=11641|UniProtKB=Q9NQB0	TCF7L2	Transcription factor 7-like 2	TRANSCRIPTION FACTOR 7-LIKE 2 (PTHR10373:SF32)	-	Homo sapiens
		TCF7L2
		ortholog
HUMAN|HGNC=13761|UniProtKB=Q9UBG7	RBPJL	Recombining binding protein suppressor of hairless-like protein	RECOMBINING BINDING PROTEIN SUPPRESSOR OF HAIRLESS-LIKE PROTEIN (PTHR10665:SF2)	nucleic acid binding	Homo sapiens
		RBPJL		transcription factor
		ortholog
HUMAN|HGNC=10776|UniProtKB=Q8N474	SFRP1	Secreted frizzled-related protein 1	SECRETED FRIZZLED-RELATED PROTEIN 1 (PTHR11309:SF87)	G-protein coupled receptor	Homo sapiens
		SFRP1		protease inhibitor
		ortholog		signaling molecule
HUMAN|HGNC=8975|UniProtKB=P42336	PIK3CA	Phosphatidylinositol 4,5-bisphosphate 3-kinase catalytic subunit alpha isoform	PHOSPHATIDYLINOSITOL 4,5-BISPHOSPHATE 3-KINASE CATALYTIC SUBUNIT ALPHA ISOFORM (PTHR10048:SF14)	kinase	Homo sapiens
		PIK3CA
		ortholog
HUMAN|HGNC=583|UniProtKB=P25054	APC	Adenomatous polyposis coli protein	ADENOMATOUS POLYPOSIS COLI PROTEIN (PTHR12607:SF11)	-	Homo sapiens
		APC
		ortholog
HUMAN|HGNC=6189|UniProtKB=Q9Y219	JAG2	Protein jagged-2	PROTEIN JAGGED-2 (PTHR24044:SF421)	-	Homo sapiens
		JAG2
		ortholog

## Sheet: Notch signaling pathway
Gene ID	Mapped IDs	Gene Name	PANTHER Family/Subfamily	PANTHER Protein Class	Species
HUMAN|HGNC=9508|UniProtKB=P49768	PSEN1	Presenilin-1	PRESENILIN-1 (PTHR10202:SF18)	aspartic protease	Homo sapiens
		PSEN1		calcium-binding protein
		ortholog		membrane-bound signaling molecule
HUMAN|HGNC=7883|UniProtKB=Q9UM47	NOTCH3	Neurogenic locus notch homolog protein 3	NEUROGENIC LOCUS NOTCH HOMOLOG PROTEIN 3 (PTHR45836:SF17)	-	Homo sapiens
		NOTCH3
		ortholog
HUMAN|HGNC=6560|UniProtKB=Q8NES3	LFNG	Beta-1,3-N-acetylglucosaminyltransferase lunatic fringe	BETA-1,3-N-ACETYLGLUCOSAMINYLTRANSFERASE LUNATIC FRINGE (PTHR10811:SF7)	glycosyltransferase	Homo sapiens
		LFNG		signaling molecule
		ortholog
HUMAN|HGNC=5724|UniProtKB=Q06330	RBPJ	Recombining binding protein suppressor of hairless	RECOMBINING BINDING PROTEIN SUPPRESSOR OF HAIRLESS (PTHR10665:SF3)	nucleic acid binding	Homo sapiens
		RBPJ		transcription factor
		ortholog
HUMAN|HGNC=17091|UniProtKB=Q92542	NCSTN	Nicastrin	NICASTRIN (PTHR21092:SF0)	-	Homo sapiens
		NCSTN
		ortholog
HUMAN|HGNC=16712|UniProtKB=Q969H0	FBXW7	F-box/WD repeat-containing protein 7	F-BOX/WD REPEAT-CONTAINING PROTEIN 7 (PTHR19849:SF1)	enzyme modulator	Homo sapiens
		FBXW7
		ortholog
HUMAN|HGNC=7881|UniProtKB=P46531	NOTCH1	Neurogenic locus notch homolog protein 1	NEUROGENIC LOCUS NOTCH HOMOLOG PROTEIN 1 (PTHR45836:SF12)	-	Homo sapiens
		NOTCH1
		ortholog
HUMAN|HGNC=13761|UniProtKB=Q9UBG7	RBPJL	Recombining binding protein suppressor of hairless-like protein	RECOMBINING BINDING PROTEIN SUPPRESSOR OF HAIRLESS-LIKE PROTEIN (PTHR10665:SF2)	nucleic acid binding	Homo sapiens
		RBPJL		transcription factor
		ortholog
HUMAN|HGNC=24149|UniProtKB=Q9HCC6	HES4	Transcription factor HES-4	TRANSCRIPTION FACTOR HES-4 (PTHR10985:SF125)	basic helix-loop-helix transcription factor	Homo sapiens
		HES4
		ortholog
HUMAN|HGNC=6189|UniProtKB=Q9Y219	JAG2	Protein jagged-2	PROTEIN JAGGED-2 (PTHR24044:SF421)	-	Homo sapiens
		JAG2
		ortholog

## Sheet: Cadherin signaling pathway
Gene ID	Mapped IDs	Gene Name	PANTHER Family/Subfamily	PANTHER Protein Class	Species
HUMAN|HGNC=4045|UniProtKB=O75084	FZD7	Frizzled-7	FRIZZLED-7 (PTHR11309:SF31)	G-protein coupled receptor	Homo sapiens
		FZD7		protease inhibitor
		ortholog		signaling molecule
HUMAN|HGNC=3595|UniProtKB=Q14517	FAT1	Protocadherin Fat 1	PROTOCADHERIN FAT 1 (PTHR24026:SF42)	-	Homo sapiens
		FAT1
		ortholog
HUMAN|HGNC=4047|UniProtKB=O00144	FZD9	Frizzled-9	FRIZZLED-9 (PTHR11309:SF79)	G-protein coupled receptor	Homo sapiens
		FZD9		protease inhibitor
		ortholog		signaling molecule
HUMAN|HGNC=4042|UniProtKB=Q9ULV1	FZD4	Frizzled-4	FRIZZLED-4 (PTHR11309:SF23)	G-protein coupled receptor	Homo sapiens
		FZD4		protease inhibitor
		ortholog		signaling molecule
HUMAN|HGNC=12783|UniProtKB=P56705	WNT4	Protein Wnt-4	PROTEIN WNT-4 (PTHR12027:SF101)	signaling molecule	Homo sapiens
		WNT4
		ortholog
HUMAN|HGNC=12789|UniProtKB=Q93098	WNT8B	Protein Wnt-8b	PROTEIN WNT-8B (PTHR12027:SF94)	signaling molecule	Homo sapiens
		WNT8B
		ortholog
HUMAN|HGNC=3431|UniProtKB=P21860	ERBB3	Receptor tyrosine-protein kinase erbB-3	RECEPTOR TYROSINE-PROTEIN KINASE ERBB-3 (PTHR24416:SF88)	-	Homo sapiens
		ERBB3
		ortholog
HUMAN|HGNC=12775|UniProtKB=O00744	WNT10B	Protein Wnt-10b	PROTEIN WNT-10B (PTHR12027:SF76)	signaling molecule	Homo sapiens
		WNT10B
		ortholog
HUMAN|HGNC=11641|UniProtKB=Q9NQB0	TCF7L2	Transcription factor 7-like 2	TRANSCRIPTION FACTOR 7-LIKE 2 (PTHR10373:SF32)	-	Homo sapiens
		TCF7L2
		ortholog
HUMAN|HGNC=13681|UniProtKB=Q96JQ0	DCHS1	Protocadherin-16	PROTOCADHERIN-16 (PTHR24027:SF423)	-	Homo sapiens
		DCHS1
		ortholog
HUMAN|HGNC=23112|UniProtKB=Q8TDW7	FAT3	Protocadherin Fat 3	PROTOCADHERIN FAT 3 (PTHR24026:SF49)	-	Homo sapiens
		FAT3
		ortholog

## Sheet: Alzheimer disease-presenilin
Gene ID	Mapped IDs	Gene Name	PANTHER Family/Subfamily	PANTHER Protein Class	Species
HUMAN|HGNC=4045|UniProtKB=O75084	FZD7	Frizzled-7	FRIZZLED-7 (PTHR11309:SF31)	G-protein coupled receptor	Homo sapiens
		FZD7		protease inhibitor
		ortholog		signaling molecule
HUMAN|HGNC=9508|UniProtKB=P49768	PSEN1	Presenilin-1	PRESENILIN-1 (PTHR10202:SF18)	aspartic protease	Homo sapiens
		PSEN1		calcium-binding protein
		ortholog		membrane-bound signaling molecule
HUMAN|HGNC=7883|UniProtKB=Q9UM47	NOTCH3	Neurogenic locus notch homolog protein 3	NEUROGENIC LOCUS NOTCH HOMOLOG PROTEIN 3 (PTHR45836:SF17)	-	Homo sapiens
		NOTCH3
		ortholog
HUMAN|HGNC=5724|UniProtKB=Q06330	RBPJ	Recombining binding protein suppressor of hairless	RECOMBINING BINDING PROTEIN SUPPRESSOR OF HAIRLESS (PTHR10665:SF3)	nucleic acid binding	Homo sapiens
		RBPJ		transcription factor
		ortholog
HUMAN|HGNC=17091|UniProtKB=Q92542	NCSTN	Nicastrin	NICASTRIN (PTHR21092:SF0)	-	Homo sapiens
		NCSTN
		ortholog
HUMAN|HGNC=4047|UniProtKB=O00144	FZD9	Frizzled-9	FRIZZLED-9 (PTHR11309:SF79)	G-protein coupled receptor	Homo sapiens
		FZD9		protease inhibitor
		ortholog		signaling molecule
HUMAN|HGNC=7881|UniProtKB=P46531	NOTCH1	Neurogenic locus notch homolog protein 1	NEUROGENIC LOCUS NOTCH HOMOLOG PROTEIN 1 (PTHR45836:SF12)	-	Homo sapiens
		NOTCH1
		ortholog
HUMAN|HGNC=4042|UniProtKB=Q9ULV1	FZD4	Frizzled-4	FRIZZLED-4 (PTHR11309:SF23)	G-protein coupled receptor	Homo sapiens
		FZD4		protease inhibitor
		ortholog		signaling molecule
HUMAN|HGNC=12783|UniProtKB=P56705	WNT4	Protein Wnt-4	PROTEIN WNT-4 (PTHR12027:SF101)	signaling molecule	Homo sapiens
		WNT4
		ortholog
HUMAN|HGNC=6697|UniProtKB=O75197	LRP5	Low-density lipoprotein receptor-related protein 5	LOW-DENSITY LIPOPROTEIN RECEPTOR-RELATED PROTEIN 5 (PTHR46513:SF16)	-	Homo sapiens
		LRP5
		ortholog
HUMAN|HGNC=12789|UniProtKB=Q93098	WNT8B	Protein Wnt-8b	PROTEIN WNT-8B (PTHR12027:SF94)	signaling molecule	Homo sapiens
		WNT8B
		ortholog
HUMAN|HGNC=12775|UniProtKB=O00744	WNT10B	Protein Wnt-10b	PROTEIN WNT-10B (PTHR12027:SF76)	signaling molecule	Homo sapiens
		WNT10B
		ortholog
HUMAN|HGNC=3086|UniProtKB=O14641	DVL2	Segment polarity protein dishevelled homolog DVL-2	SEGMENT POLARITY PROTEIN DISHEVELLED HOMOLOG DVL-2 (PTHR10878:SF8)	enzyme modulator	Homo sapiens
		DVL2		signaling molecule
		ortholog
HUMAN|HGNC=11641|UniProtKB=Q9NQB0	TCF7L2	Transcription factor 7-like 2	TRANSCRIPTION FACTOR 7-LIKE 2 (PTHR10373:SF32)	-	Homo sapiens
		TCF7L2
		ortholog
HUMAN|HGNC=13761|UniProtKB=Q9UBG7	RBPJL	Recombining binding protein suppressor of hairless-like protein	RECOMBINING BINDING PROTEIN SUPPRESSOR OF HAIRLESS-LIKE PROTEIN (PTHR10665:SF2)	nucleic acid binding	Homo sapiens
		RBPJL		transcription factor
		ortholog

## Sheet: Wnt signaling pathway 
Gene ID	Mapped IDs	Gene Name	PANTHER Family/Subfamily	PANTHER Protein Class	Species
HUMAN|HGNC=4045|UniProtKB=O75084	FZD7	Frizzled-7	FRIZZLED-7 (PTHR11309:SF31)	G-protein coupled receptor	Homo sapiens
		FZD7		protease inhibitor
		ortholog		signaling molecule
HUMAN|HGNC=3595|UniProtKB=Q14517	FAT1	Protocadherin Fat 1	PROTOCADHERIN FAT 1 (PTHR24026:SF42)	-	Homo sapiens
		FAT1
		ortholog
HUMAN|HGNC=11998|UniProtKB=P04637	TP53	Cellular tumor antigen p53	CELLULAR TUMOR ANTIGEN P53 (PTHR11447:SF6)	P53-like transcription factor	Homo sapiens
		TP53
		ortholog
HUMAN|HGNC=16712|UniProtKB=Q969H0	FBXW7	F-box/WD repeat-containing protein 7	F-BOX/WD REPEAT-CONTAINING PROTEIN 7 (PTHR19849:SF1)	enzyme modulator	Homo sapiens
		FBXW7
		ortholog
HUMAN|HGNC=4047|UniProtKB=O00144	FZD9	Frizzled-9	FRIZZLED-9 (PTHR11309:SF79)	G-protein coupled receptor	Homo sapiens
		FZD9		protease inhibitor
		ortholog		signaling molecule
HUMAN|HGNC=4042|UniProtKB=Q9ULV1	FZD4	Frizzled-4	FRIZZLED-4 (PTHR11309:SF23)	G-protein coupled receptor	Homo sapiens
		FZD4		protease inhibitor
		ortholog		signaling molecule
HUMAN|HGNC=12783|UniProtKB=P56705	WNT4	Protein Wnt-4	PROTEIN WNT-4 (PTHR12027:SF101)	signaling molecule	Homo sapiens
		WNT4
		ortholog
HUMAN|HGNC=6697|UniProtKB=O75197	LRP5	Low-density lipoprotein receptor-related protein 5	LOW-DENSITY LIPOPROTEIN RECEPTOR-RELATED PROTEIN 5 (PTHR46513:SF16)	-	Homo sapiens
		LRP5
		ortholog
HUMAN|HGNC=12789|UniProtKB=Q93098	WNT8B	Protein Wnt-8b	PROTEIN WNT-8B (PTHR12027:SF94)	signaling molecule	Homo sapiens
		WNT8B
		ortholog
HUMAN|HGNC=12775|UniProtKB=O00744	WNT10B	Protein Wnt-10b	PROTEIN WNT-10B (PTHR12027:SF76)	signaling molecule	Homo sapiens
		WNT10B
		ortholog
HUMAN|HGNC=3086|UniProtKB=O14641	DVL2	Segment polarity protein dishevelled homolog DVL-2	SEGMENT POLARITY PROTEIN DISHEVELLED HOMOLOG DVL-2 (PTHR10878:SF8)	enzyme modulator	Homo sapiens
		DVL2		signaling molecule
		ortholog
HUMAN|HGNC=11641|UniProtKB=Q9NQB0	TCF7L2	Transcription factor 7-like 2	TRANSCRIPTION FACTOR 7-LIKE 2 (PTHR10373:SF32)	-	Homo sapiens
		TCF7L2
		ortholog
HUMAN|HGNC=3373|UniProtKB=Q09472	EP300	Histone acetyltransferase p300	HISTONE ACETYLTRANSFERASE P300 (PTHR13808:SF29)	acetyltransferase	Homo sapiens
		EP300		chromatin/chromatin-binding protein
		ortholog		transcription cofactor
HUMAN|HGNC=2348|UniProtKB=Q92793	CREBBP	CREB-binding protein	CREB-BINDING PROTEIN (PTHR13808:SF34)	acetyltransferase	Homo sapiens
		CREBBP		chromatin/chromatin-binding protein
		ortholog		transcription cofactor
HUMAN|HGNC=13681|UniProtKB=Q96JQ0	DCHS1	Protocadherin-16	PROTOCADHERIN-16 (PTHR24027:SF423)	-	Homo sapiens
		DCHS1
		ortholog
HUMAN|HGNC=7553|UniProtKB=P01106	MYC	Myc proto-oncogene protein	MYC PROTO-ONCOGENE PROTEIN (PTHR45851:SF1)	basic helix-loop-helix transcription factor	Homo sapiens
		MYC		nucleic acid binding
		ortholog
HUMAN|HGNC=11838|UniProtKB=Q04725	TLE2	Transducin-like enhancer protein 2	TRANSDUCIN-LIKE ENHANCER PROTEIN 2 (PTHR10814:SF4)	transcription cofactor	Homo sapiens
		TLE2
		ortholog
HUMAN|HGNC=23112|UniProtKB=Q8TDW7	FAT3	Protocadherin Fat 3	PROTOCADHERIN FAT 3 (PTHR24026:SF49)	-	Homo sapiens
		FAT3
		ortholog
HUMAN|HGNC=10776|UniProtKB=Q8N474	SFRP1	Secreted frizzled-related protein 1	SECRETED FRIZZLED-RELATED PROTEIN 1 (PTHR11309:SF87)	G-protein coupled receptor	Homo sapiens
		SFRP1		protease inhibitor
		ortholog		signaling molecule
HUMAN|HGNC=583|UniProtKB=P25054	APC	Adenomatous polyposis coli protein	ADENOMATOUS POLYPOSIS COLI PROTEIN (PTHR12607:SF11)	-	Homo sapiens
		APC
		ortholog

## Sheet: P53 pathway
Gene ID	Mapped IDs	Gene Name	PANTHER Family/Subfamily	PANTHER Protein Class	Species
HUMAN|HGNC=11998|UniProtKB=P04637	TP53	Cellular tumor antigen p53	CELLULAR TUMOR ANTIGEN P53 (PTHR11447:SF6)	P53-like transcription factor	Homo sapiens
		ortholog
HUMAN|HGNC=11998|UniProtKB=P04637	TP53	Cellular tumor antigen p53	CELLULAR TUMOR ANTIGEN P53 (PTHR11447:SF6)	P53-like transcription factor	Homo sapiens
		ortholog
HUMAN|HGNC=3942|UniProtKB=P42345	MTOR	Serine/threonine-protein kinase mTOR	SERINE/THREONINE-PROTEIN KINASE MTOR (PTHR11139:SF9)	non-receptor serine/threonine protein kinase	Homo sapiens
		MTOR		nucleic acid binding
		ortholog		nucleotide kinase
HUMAN|HGNC=10436|UniProtKB=P23443	RPS6KB1	Ribosomal protein S6 kinase beta-1	RIBOSOMAL PROTEIN S6 KINASE BETA-1 (PTHR24351:SF190)	-	Homo sapiens
		RPS6KB1
		ortholog
HUMAN|HGNC=12363|UniProtKB=P49815	TSC2	Tuberin	TUBERIN (PTHR10063:SF0)	G-protein modulator	Homo sapiens
		TSC2
		ortholog
HUMAN|HGNC=12362|UniProtKB=Q92574	TSC1	Hamartin	HAMARTIN (PTHR15154:SF2)	-	Homo sapiens
		TSC1
		ortholog
HUMAN|HGNC=8980|UniProtKB=O00459	PIK3R2	Phosphatidylinositol 3-kinase regulatory subunit beta	PHOSPHATIDYLINOSITOL 3-KINASE REGULATORY SUBUNIT BETA (PTHR10155:SF1)	kinase modulator	Homo sapiens
		PIK3R2
		ortholog
HUMAN|HGNC=11998|UniProtKB=P04637	TP53	Cellular tumor antigen p53	CELLULAR TUMOR ANTIGEN P53 (PTHR11447:SF6)	P53-like transcription factor	Homo sapiens
		TP53
		ortholog
HUMAN|HGNC=1589|UniProtKB=P24864	CCNE1	G1/S-specific cyclin-E1	G1/S-SPECIFIC CYCLIN-E1 (PTHR10177:SF71)	kinase activator	Homo sapiens
		CCNE1
		ortholog
HUMAN|HGNC=6407|UniProtKB=P01116	KRAS	GTPase KRas	GTPASE KRAS (PTHR24070:SF388)	small GTPase	Homo sapiens
		KRAS
		ortholog
HUMAN|HGNC=7553|UniProtKB=P01106	MYC	Myc proto-oncogene protein	MYC PROTO-ONCOGENE PROTEIN (PTHR45851:SF1)	basic helix-loop-helix transcription factor	Homo sapiens
		MYC		nucleic acid binding
		ortholog
HUMAN|HGNC=8975|UniProtKB=P42336	PIK3CA	Phosphatidylinositol 4,5-bisphosphate 3-kinase catalytic subunit alpha isoform	PHOSPHATIDYLINOSITOL 4,5-BISPHOSPHATE 3-KINASE CATALYTIC SUBUNIT ALPHA ISOFORM (PTHR10048:SF14)	kinase	Homo sapiens
		PIK3CA
		ortholog
HUMAN|HGNC=8980|UniProtKB=O00459	PIK3R2	Phosphatidylinositol 3-kinase regulatory subunit beta	PHOSPHATIDYLINOSITOL 3-KINASE REGULATORY SUBUNIT BETA (PTHR10155:SF1)	kinase modulator	Homo sapiens
		PIK3R2
		ortholog
HUMAN|HGNC=11998|UniProtKB=P04637	TP53	Cellular tumor antigen p53	CELLULAR TUMOR ANTIGEN P53 (PTHR11447:SF6)	P53-like transcription factor	Homo sapiens
		TP53
		ortholog
HUMAN|HGNC=1589|UniProtKB=P24864	CCNE1	G1/S-specific cyclin-E1	G1/S-SPECIFIC CYCLIN-E1 (PTHR10177:SF71)	kinase activator	Homo sapiens
		CCNE1
		ortholog
HUMAN|HGNC=3373|UniProtKB=Q09472	EP300	Histone acetyltransferase p300	HISTONE ACETYLTRANSFERASE P300 (PTHR13808:SF29)	acetyltransferase	Homo sapiens
		EP300		chromatin/chromatin-binding protein
		ortholog		transcription cofactor
HUMAN|HGNC=2348|UniProtKB=Q92793	CREBBP	CREB-binding protein	CREB-BINDING PROTEIN (PTHR13808:SF34)	acetyltransferase	Homo sapiens
		CREBBP		chromatin/chromatin-binding protein
		ortholog		transcription cofactor
HUMAN|HGNC=8975|UniProtKB=P42336	PIK3CA	Phosphatidylinositol 4,5-bisphosphate 3-kinase catalytic subunit alpha isoform	PHOSPHATIDYLINOSITOL 4,5-BISPHOSPHATE 3-KINASE CATALYTIC SUBUNIT ALPHA ISOFORM (PTHR10048:SF14)	kinase	Homo sapiens
		PIK3CA
		ortholog
